# Supplementary material
Source: MDPI journal article supplement (https://www.mdpi.com/2813-3064/2/1/4)
Supplement: s1 [file s1]

## **PUBMED**

(((((Multiple sclerosis[MeSH Terms]) OR (Multiple sclerosis[Title/Abstract])) OR (MS[Title/Abstract])) OR (Disseminated Sclerosis[Title/Abstract])) AND (((((((((((((((Mobile Applications[MeSH Terms]) OR (Mobile Applications[Title/Abstract])) OR (Mobile App[Title/Abstract])) OR (Portable Software[Title/Abstract])) OR (Portable Electronic App[Title/Abstract])) OR (Smartphone[MeSH Terms])) OR (Smartphone[Title/Abstract])) OR (Wearable Electronic Devices[MeSH Terms])) OR (Wearable Electronic Devices[Title/Abstract])) OR (Wearable Technologies[Title/Abstract])) OR (Wearable Devices[Title/Abstract])) OR (Fitness Trackers[MeSH Terms])) OR (Fitness Trackers[Title/Abstract])) OR (Activity Tracker[Title/Abstract])) OR (Monitoring, Ambulatory[MeSH Terms])) OR (Ambulatory Monitoring[Title/Abstract])))) AND (((((Fatigue[MeSH Terms]) OR (Fatigue[Title/Abstract])) OR (Lassitude[Title/Abstract])) OR (Asthenia[MeSH Terms])) OR (Asthenia[Title/Abstract]))

## **WEB OF SCIENCE**

((TS=(multiple sclerosis)) OR TS=(MS)) OR TS=(Disseminated Sclerosis)  
AND  
(((((((TS=(Mobile Applications)) OR TS=(Mobile App)) OR TS=(Portable Software)) OR TS=(Smartphone)) OR TS=(Wearable Devices)) OR TS=(Wearable Technologies)) OR TS=(Fitness Trackers)) OR TS=(Activity Tracker)  
AND  
((TS=(Fatigue)) OR TS=(Lassitude)) OR TS=(Asthenia)

## **SCIENCEDIRECT**

(Multiple sclerosis OR MS) AND (Mobile Applications OR Portable Software OR Smartphone OR Wearable Devices OR Tracker) AND (Fatigue OR Asthenia)

## **EMBASE**

'multiple sclerosis':ti OR 'multiple sclerosis':ab OR 'multiple sclerosis':kw OR ms:ti OR ms:ab OR ms:kw  
AND  
'mobile application':ti OR 'mobile application':ab OR 'mobile application':kw OR 'smartphone':ab OR 'smartphone':kw OR 'smartphone':ti OR 'wearable computer':ab OR 'wearable computer':kw OR 'wearable computer':ti OR 'wearable device':ab OR 'wearable device':kw OR 'wearable device':ti OR 'activity tracker':ab OR 'activity tracker':kw OR 'activity tracker':ti  
AND  
'fatigue':ab OR 'fatigue':kw OR 'fatigue':ti OR 'lassitude':ab OR 'lassitude':kw OR 'lassitude':ti OR 'asthenia':ab OR 'asthenia':kw OR 'asthenia':ti
